# Supplementary material
Source: MDPI journal article supplement (https://www.mdpi.com/2071-1050/13/6/3317)
Supplement: s1 [file s1]

## **Supplementary Materials 1 (S1): Classification Tree**

Operational definitions of the Classification tree

1. Access to technological resources: this refers to the real possibility of being in possession of and having access to technological and digital resources both in an educational setting (school) and in a domestic setting (home), as well as knowing how to use these resources.

1.1. Availability of resources: this specifically refers to access to resources in all settings.

1.1.1. At school: availability in the classroom and within the school grounds.

1.1.2. Outside of school: availability at each family home.

1.2. Autonomy: this refers to how much the person uses the resources and how competent a user they are.

1.2.1. Usage habits: user competency level, frequency and purpose for which they are used.

2. Assessment of ICT and e-learning in face-to-face teaching: this refers to the degree of adaptation, acceptance, use and perceived understanding of Information and Communication Technologies (ICT), and of related methodologies, in the context of classroom teaching.

2.1. Use of ICT in teaching: this refers to how often ICT are used in teaching, and for what purpose.

2.1.1. Use: perception of use as an educational resource.

2.1.2. Function: purpose for which they are used as an educational resource.

2.2. Assessment of ICT in context: this refers to the perspective and opinion on the use, applicability and suitability of ICT in the educational context.

2.2.1. Opinion on suitability for use and function: assessment of the need to use ICT in teaching and the way in which it is currently used.

2.3. Specific training: this refers to the suitability of personal resources (training, understanding, etc.) and material resources for the use of ICT in the educational context.

2.3.1. Specific training on teaching tools: Perception of the level of understanding that teachers and students have of the use of different educational devices and applications.

2.3.2. Suitability of the school: assessment of the resources and facilities that the school has available for use of ICT (equipment, maintenance, connection).

3. Effects of e-learning in remote teaching and lockdown: this refers to the degree of adaptation, use and perceived understanding of the e-learning methodology, and associated technological and digital resources, in the field of non-classroom teaching and during the lockdown.

3.1. Adaptation of ICT to content and subjects: this refers to the type of technological and digital resources that have been used during lockdown to apply an e-learning methodology. It also refers to how they were used in the different areas of the curriculum, considering the advantages and disadvantages of this methodology.

3.1.1. Platforms and applications used: the technological and digital resources used to monitor teaching.

3.1.2. Relevance of ICT to the different areas: assessment of the suitability of technological and digital resources for use in different subjects.

3.1.3. Function of ICT: main use given to the different technological and digital resources.

3.1.4. Benefits: advantages found in this type of teaching methodology.

3.1.5. Difficulties: disadvantages associated with the e-learning methodology.

3.1.6. Diversity outreach: perception of the possibility of being able to attend to the different needs of students.

3.2. Methodology: this refers to how the e-learning methodology has been applied, considering its different elements such as developing materials, related monitoring (and feedback), tasks and activities set, and the roles played by the main agents in the teaching-learning process (teachers and students).

3.2.1. Approach to tasks and materials: how the materials have been created, as well as an assessment of the volume of work set.

3.2.2. Monitoring and assessment: description of how feedback on the tasks and materials created was applied.

3.2.3. Type of activity: this is specifically focused on differentiating between individual work and group or cooperative work.

3.2.4. Main roles: students and teachers. Perception of their functions, including aspects such as interest or involvement.

3.3. Facilitating elements: this refers to those aspects which facilitate and promote proper use and scope of the e-learning methodology.

3.3.1. Personal aspects: this refers to those aspects which depend directly on students, family members or teachers, such as access to technological resources.

3.3.2. Contextual aspects: these focus on management and organisational aspects associated with schools and education authorities.

3.3.3. Technical/technological aspects: these are inherent aspects of technological and digital resources.

3.4. Limiting aspects: this refers to those aspects that can be considered as stumbling blocks for proper use and scope of the e-learning methodology.

3.4.1. Personal reasons: aspects of the personal and family situation, such as lack of access to technological devices or to the Internet.

3.4.2. Contextual reasons: aspects that depend directly on the authorities or the management board (guidelines for assessment and marking, etc.)

3.4.3. Technical/technological reasons: aspects which depend directly on the functioning of the technological and digital resources.

3.5. Effects on learning and emotions: this refers to the perception of acquired learning during lockdown and via the e-learning methodology, as well as the psychological experience of lockdown.

3.5.1. Assessment of perceived learning: opinion on the level and quality of learning achieved through the e-learning methodology.

3.5.2. Psychological perception (emotional and cognitive): feelings triggered by this teaching methodology.

3.6. Support agents: this refers to the support processes carried out by each of the educational agents as a factor relating to success in the use of the e-learning methodology.

3.6.1. Teachers: this refers to their role as an emotional support, not to the role of guiding the learning process.

3.6.2. Family members: functions carried out by family members during the support process, whether on an academic or emotional level.

3.6.3. Classmates and friends: role of peers during the use of this teaching methodology during lockdown.

Table 1. Presence of each unit of information in the total number of files analysed

| Classification Tree                                          | Arc. Stu |        | Arc. Fam |        | Arc. Tea |        | Arc. MMB |        |
|--------------------------------------------------------------|----------|--------|----------|--------|----------|--------|----------|--------|
|                                                              | N        | %      | N        | %      | N        | %      | N        | %      |
| 1. Access to technological resources                         | 15       | 50.00  | 25       | 100.00 | 29       | 100.00 | 6        | 100.00 |
| 1.1. Availability of resources                               | 9        | 30.00  | 25       | 100.00 | 29       | 100.00 | 6        | 100.00 |
| 1.1.1. At the school                                         | 3        | 10.00  | 13       | 52.00  | 19       | 65.52  | 5        | 83.33  |
| 1.1.2. Outside of the school                                 | 7        | 23.33  | 24       | 96.00  | 28       | 96.55  | 6        | 100.00 |
| 1.2. Autonomy                                                | 7        | 23.33  | 23       | 92.00  | 26       | 89.66  | 6        | 100.00 |
| 1.2.1. Usage habits                                          | 7        | 23.33  | 23       | 92.00  | 26       | 89.66  | 6        | 100.00 |
| 2. Assessment of ICT and e-learning in face-to-face teaching | 29       | 96.67  | 25       | 100.00 | 29       | 100.00 | 6        | 100.00 |
| 2.1. Use of ICT in teaching                                  | 28       | 93.33  | 24       | 96.00  | 27       | 93.10  | 6        | 100.00 |
| 2.1.1. Use                                                   | 26       | 86.67  | 23       | 92.00  | 20       | 68.97  | 6        | 100.00 |
| 2.1.2. Function                                              | 17       | 56.67  | 10       | 40.00  | 16       | 55.17  | 1        | 16.67  |
| 2.2. Assessment of ICT in context                            | 15       | 50.00  | 24       | 96.00  | 28       | 96.55  | 6        | 100.00 |
| 2.2.1. Opinion on suitability for use and function           | 15       | 50.00  | 24       | 96.00  | 28       | 96.55  | 6        | 100.00 |
| 2.3. Specific training                                       | 1        | 3.33   | 25       | 100.00 | 29       | 100.00 | 6        | 100.00 |
| 2.3.1. Specific training on teaching tools                   | 1        | 3.33   | 25       | 100.00 | 29       | 100.00 | 6        | 100.00 |
| 2.3.2. Suitability of the school                             | 0        | 0.00   | 21       | 84.00  | 24       | 82.76  | 5        | 83.33  |
| 3. Effects of e-learning in remote teaching and lockdown     | 30       | 100.00 | 25       | 100.00 | 29       | 100.00 | 6        | 100.00 |
| 3.1. Adaptation of ICT to content and subjects               | 30       | 100.00 | 25       | 100.00 | 29       | 100.00 | 6        | 100.00 |
| 3.1.1. Platforms and applications used                       | 29       | 96.67  | 23       | 92.00  | 24       | 82.76  | 6        | 100.00 |
| 3.1.2. Relevance of ICT to the different areas               | 5        | 16.67  | 5        | 20.00  | 11       | 37.93  | 3        | 50.00  |
| 3.1.3. Role of ICT                                           | 6        | 20.00  | 0        | 0.00   | 16       | 55.17  | 1        | 16.67  |
| 3.1.4. Benefits                                              | 12       | 40.00  | 20       | 80.00  | 28       | 96.55  | 6        | 100.00 |
| 3.1.5. Difficulties                                          | 19       | 63.33  | 22       | 88.00  | 22       | 75.86  | 6        | 100.00 |
| 3.1.6. Diversity outreach                                    | 3        | 10.00  | 24       | 96.00  | 27       | 93.10  | 5        | 83.33  |
| 3.2. Methodology                                             | 30       | 100.00 | 25       | 100.00 | 29       | 100.00 | 6        | 100.00 |
| 3.2.1. Approach to tasks and materials                       | 30       | 100.00 | 17       | 68.00  | 15       | 51.72  | 6        | 100.00 |
| 3.2.2. Monitoring and evaluation                             | 5        | 16.67  | 21       | 84.00  | 25       | 86.21  | 6        | 100.00 |
| 3.2.3. Types of activities                                   | 2        | 6.67   | 25       | 100.00 | 27       | 93.10  | 6        | 100.00 |
| 3.2.4. Main roles: students and teachers                     | 30       | 100.00 | 24       | 96.00  | 26       | 89.66  | 6        | 100.00 |
| 3.3. Facilitating elements                                   | 7        | 23.33  | 8        | 32.00  | 9        | 31.03  | 1        | 16.67  |
| 3.3.1. Personal aspects                                      | 7        | 23.33  | 6        | 24.00  | 2        | 6.90   | 1        | 16.67  |
| 3.3.2. Contextual aspects                                    | 0        | 0.00   | 1        | 4.00   | 7        | 24.14  | 0        | 0.00   |
| 3.3.3. Technical/technological aspects                       | 0        | 0.00   | 1        | 4.00   | 1        | 3.45   | 0        | 0.00   |
| 3.4. Limiting aspects                                        | 24       | 80.00  | 17       | 68.00  | 26       | 89.66  | 6        | 100.00 |
| 3.4.1. Personal reasons                                      | 11       | 36.67  | 12       | 48.00  | 19       | 65.52  | 6        | 100.00 |
| 3.4.2. Contextual reasons                                    | 3        | 10.00  | 3        | 12.00  | 13       | 44.83  | 1        | 16.67  |
| 3.4.3. Technical/technological reasons                       | 17       | 56.67  | 8        | 32.00  | 12       | 41.38  | 1        | 16.67  |
| 3.5. Effects on learning and emotions                        | 25       | 83.33  | 25       | 100.00 | 29       | 100.00 | 6        | 100.00 |
| 3.5.1. Assessment of perceived learning                      | 23       | 76.67  | 18       | 72.00  | 17       | 58.62  | 1        | 16.67  |
| 3.5.2. Psychological perception                              | 11       | 36.67  | 25       | 100.00 | 28       | 96.55  | 6        | 100.00 |
| 3.6. Supporting agents                                       | 30       | 100.00 | 25       | 100.00 | 29       | 100.00 | 6        | 100.00 |
| 3.6.1. Teachers                                              | 4        | 13.33  | 6        | 24.00  | 24       | 82.76  | 4        | 66.67  |
| 3.6.2. Family members                                        | 26       | 86.67  | 24       | 96.00  | 26       | 89.66  | 6        | 100.00 |
| 3.6.3. Classmates and friends                                | 29       | 96.67  | 13       | 52.00  | 16       | 55.17  | 3        | 50.00  |

*Note:* Arc. = Files; Stu = Students; Fam = Family Members; Tea = Teachers; MMB = Members of management boards.

Table 2. Number of lines of the different coded information units

| Clasification Tree                                           | Lines Stu |       | Lines Fam |       | Lines Tea |       | Lines MMB |       |
|--------------------------------------------------------------|-----------|-------|-----------|-------|-----------|-------|-----------|-------|
|                                                              | N         | %     | N         | %     | N         | %     | N         | %     |
| 1. Access to technological resources                         | 20        | 2.47  | 187       | 8.09  | 325       | 8.70  | 64        | 8.96  |
| 1.1. Availability of resources                               | 12        | 1.48  | 98        | 4.24  | 151       | 4.04  | 39        | 5.46  |
| 1.1.1. At the school                                         | 3         | 0.37  | 32        | 1.38  | 54        | 1.45  | 19        | 2.66  |
| 1.1.2. Outside of the school                                 | 9         | 1.11  | 66        | 2.86  | 97        | 2.60  | 20        | 2.80  |
| 1.2. Autonomy                                                | 8         | 0.99  | 89        | 3.85  | 174       | 4.66  | 25        | 3.50  |
| 1.2.1. Usage habits                                          | 8         | 0.99  | 89        | 3.85  | 174       | 4.66  | 25        | 3.50  |
| 2. Assessment of ICT and e-learning in face-to-face teaching | 93        | 11.50 | 467       | 20.21 | 706       | 18.90 | 176       | 24.65 |
| 2.1. Use of ICT in teaching                                  | 67        | 8.28  | 87        | 3.76  | 134       | 3.59  | 36        | 5.04  |
| 2.1.1. Use                                                   | 38        | 4.70  | 51        | 2.21  | 56        | 1.50  | 24        | 3.36  |
| 2.1.2. Function                                              | 29        | 3.58  | 36        | 1.56  | 78        | 2.09  | 12        | 1.68  |
| 2.2. Assessment of ICT in context                            | 25        | 3.09  | 119       | 5.15  | 103       | 2.76  | 44        | 6.16  |
| 2.2.1. Opinion on suitability for use and function           | 25        | 3.09  | 119       | 5.15  | 103       | 2.76  | 44        | 6.16  |
| 2.3. Specific training                                       | 1         | 0.12  | 261       | 11.29 | 469       | 12.56 | 96        | 13.45 |
| 2.3.1. Specific training on teaching tools                   | 1         | 0.12  | 166       | 7.18  | 328       | 8.78  | 66        | 9.24  |
| 2.3.2. Suitability of the school                             | 0         | 0.00  | 95        | 4.11  | 141       | 3.78  | 30        | 4.20  |
| 3. Effects of e-learning in remote teaching and lockdown     | 696       | 86.03 | 1657      | 71.70 | 2704      | 72.40 | 474       | 66.39 |
| 3.1. Adaptation of ICT to content and subjects               | 171       | 21.14 | 380       | 16.44 | 774       | 20.72 | 152       | 21.29 |
| 3.1.1. Platforms and applications used                       | 47        | 5.81  | 62        | 2.68  | 125       | 3.35  | 30        | 4.20  |
| 3.1.2. Relevance of ICT to the different areas               | 7         | 0.87  | 20        | 0.87  | 37        | 0.99  | 11        | 1.54  |
| 3.1.3. Role of ICT                                           | 15        | 1.85  | 0         | 0.00  | 63        | 1.69  | 2         | 0.28  |
| 3.1.4. Benefits                                              | 35        | 4.33  | 95        | 4.11  | 165       | 4.42  | 32        | 4.48  |
| 3.1.5. Difficulties                                          | 58        | 7.17  | 133       | 5.76  | 192       | 5.14  | 56        | 7.84  |
| 3.1.6. Diversity outreach                                    | 9         | 1.11  | 70        | 3.03  | 192       | 5.14  | 21        | 2.94  |
| 3.2. Methodology                                             | 275       | 33.99 | 510       | 22.07 | 690       | 18.47 | 107       | 14.99 |
| 3.2.1. Approach to tasks and materials                       | 111       | 13.72 | 60        | 2.60  | 62        | 1.66  | 25        | 3.50  |
| 3.2.2. Monitoring and evaluation                             | 11        | 1.36  | 110       | 4.76  | 207       | 5.54  | 35        | 4.90  |
| 3.2.3. Types of activities                                   | 4         | 0.49  | 84        | 3.63  | 118       | 3.16  | 19        | 2.66  |
| 3.2.4. Main roles: students and teachers                     | 149       | 18.42 | 256       | 11.08 | 303       | 8.11  | 28        | 3.92  |
| 3.3. Facilitating elements                                   | 12        | 1.48  | 29        | 1.25  | 30        | 0.80  | 3         | 0.42  |
| 3.3.1. Personal aspects                                      | 12        | 1.48  | 19        | 0.82  | 6         | 0.16  | 3         | 0.42  |
| 3.3.2. Contextual aspects                                    | 0         | 0.00  | 5         | 0.22  | 21        | 0.56  | 0         | 0.00  |
| 3.3.3. Technical/technological aspects                       | 0         | 0.00  | 5         | 0.22  | 3         | 0.08  | 0         | 0.00  |
| 3.4. Limiting aspects                                        | 55        | 6.80  | 109       | 4.72  | 272       | 7.28  | 48        | 6.72  |
| 3.4.1. Personal reasons                                      | 20        | 2.47  | 42        | 1.82  | 118       | 3.16  | 36        | 5.04  |
| 3.4.2. Contextual reasons                                    | 7         | 0.87  | 46        | 1.99  | 109       | 2.92  | 9         | 1.26  |
| 3.4.3. Technical/technological reasons                       | 28        | 3.46  | 21        | 0.91  | 45        | 1.20  | 3         | 0.42  |
| 3.5. Effects on learning and emotions                        | 68        | 8.41  | 322       | 13.93 | 440       | 11.78 | 79        | 11.06 |
| 3.5.1. Assessment of perceived learning                      | 51        | 6.30  | 102       | 4.41  | 128       | 3.43  | 8         | 1.12  |
| 3.5.2. Psychological perception                              | 17        | 2.10  | 220       | 9.52  | 312       | 8.35  | 71        | 9.94  |
| 3.6. Supporting agents                                       | 115       | 14.22 | 307       | 13.28 | 498       | 13.33 | 85        | 11.90 |
| 3.6.1. Teachers                                              | 5         | 0.62  | 18        | 0.78  | 214       | 5.73  | 19        | 2.66  |
| 3.6.2. Family members                                        | 48        | 5.93  | 180       | 7.79  | 207       | 5.54  | 55        | 7.70  |
| 3.6.3. Classmates and friends                                | 62        | 7.66  | 109       | 4.72  | 77        | 2.06  | 11        | 1.54  |

*Note:* EStu = Students; Fam = Family Members; Tea = Teachers; MMB = Members of management boards.

## Supplementary Materials 2 (S2): Consolidated criteria for reporting qualitative studies (COREQ): 32-item checklist

This is the COREQ checklist which accompanies the qualitative data gathering analysis for this dataset.

| No                                                 | Item                    | Guide questions/description                                                                                                                                                                                                                                                                                              |
|----------------------------------------------------|-------------------------|--------------------------------------------------------------------------------------------------------------------------------------------------------------------------------------------------------------------------------------------------------------------------------------------------------------------------|
| <b>Domain 1:<br/>Research team and reflexivity</b> |                         |                                                                                                                                                                                                                                                                                                                          |
| Personal Characteristics                           |                         |                                                                                                                                                                                                                                                                                                                          |
| 1.                                                 | Interviewer/facilitator | Which author/s conducted the interview or focus group?<br>The two trained interviewer were the first and second author. Third and four author were involved into the interview design.                                                                                                                                   |
| 2.                                                 | Credentials             | What were the researcher's credentials? <i>E.g. PhD, MD</i><br>The second author was a PhD candidate. The first, second and third authors were PhD.                                                                                                                                                                      |
| 3.                                                 | Occupation              | What was their occupation at the time of the study?<br>First author: PhD Assistant Professor; second author: PhD candidate, teaching on Primary School; third author: Associate Professor; fourth author: Associate Professor                                                                                            |
| 4.                                                 | Gender                  | Was the researcher male or female?<br>All the authors were male.                                                                                                                                                                                                                                                         |
| 5.                                                 | Experience and training | What experience or training did the researcher have?<br>The authors had 11, 1, 25 and 14 years of experience as researchers. The first and third author were PE researcher. The second author was a Primary School teacher who had initiated his PhD programme. The fourth author was a neuropsychological scientist and |

| No                             | Item                                                               | Guide questions/description                                                                                                                                                                                                                                                                                                                                                                                     |
|--------------------------------|--------------------------------------------------------------------|-----------------------------------------------------------------------------------------------------------------------------------------------------------------------------------------------------------------------------------------------------------------------------------------------------------------------------------------------------------------------------------------------------------------|
| Relationship with participants |                                                                    | methodologist.                                                                                                                                                                                                                                                                                                                                                                                                  |
| 6.                             | Relationship established                                           | <p>Was a relationship established prior to study commencement?</p> <p>We contacted to the participant when the study began by e-mail. Participants met the first and second author at the time of the interviews.</p>                                                                                                                                                                                           |
| 7.                             | Participant knowledge of the interviewer                           | <p>What did the participants know about the researcher? e.g. <i>personal goals, reasons for doing the research</i></p> <p>Participants knew that the first and second researchers were from Faculty of Education (University of Zaragoza, Spain). The informed consent forms explained the general study purposes. In the case of students, the informed consent included the participants' parents signed.</p> |
| 8.                             | Interviewer characteristics                                        | <p>What characteristics were reported about the interviewer/facilitator?</p> <p>Participants knew that interviewers were researchers from University of Zaragoza. They were told that we needed their opinion about e-learning during the lockdown caused by COVID-19.</p>                                                                                                                                      |
| <b>Domain 2: study design</b>  |                                                                    |                                                                                                                                                                                                                                                                                                                                                                                                                 |
| 9.                             | Theoretical framework<br><br>Methodological orientation and Theory | <p>What methodological orientation was stated to underpin the study?</p> <p>The thematic analysis focused on identifying assessments related to the benefits and limitations associated with e-learning. Content analysis was chosen as a methodological</p>                                                                                                                                                    |



| No  | Item                  | Guide questions/description                                                                                                                                                                                                                                                                                                                                                                                                                                |
|-----|-----------------------|------------------------------------------------------------------------------------------------------------------------------------------------------------------------------------------------------------------------------------------------------------------------------------------------------------------------------------------------------------------------------------------------------------------------------------------------------------|
|     |                       | orientation.                                                                                                                                                                                                                                                                                                                                                                                                                                               |
|     | Participant selection |                                                                                                                                                                                                                                                                                                                                                                                                                                                            |
| 10. | Sampling              | <p>How were participants selected?</p> <p>Sampling was done following a convenience sampling process taking into consideration several criteria: gender-parental role (Woman-Mother/Man-Father), educational level (Primary/Secondary/Non-compulsory Secondary), type of educational institution (State/Private), and availability and willingness to participate.</p>                                                                                     |
| 11. | Method of approach    | <p>How were participants approached? e.g. <i>face-to-face, telephone, mail, email</i></p> <p>An e-mail with an invitation to participate in the study was sent out. Then, a link to Google Forms showing the informed consent and the request for sample identification data was sent. The open-ended questionnaire for students was filled out on this same link. For all other educational agents, a semi-structured interview was conducted online.</p> |
| 12. | Sample size           | <p>How many participants were in the study? 30 students, 25 relatives, 29 teachers and 6 members of the management teams. 90 participants took part in the study.</p>                                                                                                                                                                                                                                                                                      |
| 13. | Non-participation     | <p>How many people refused to participate or dropped out? Reasons?</p> <p>One relative, three teachers and three members of the management boards refused to participate because they answered the short questionnaire in the initial e-mail, but they did not accepted to have an interview.</p>                                                                                                                                                          |

| No      | Item                         | Guide questions/description                                                                                                                                                                                                                                                                                                                                                                                                                                                                                                                                                                                                                                                                                                                                                                                                                                                                                                                                                                                                                                                                                                                                                                                                                            |
|---------|------------------------------|--------------------------------------------------------------------------------------------------------------------------------------------------------------------------------------------------------------------------------------------------------------------------------------------------------------------------------------------------------------------------------------------------------------------------------------------------------------------------------------------------------------------------------------------------------------------------------------------------------------------------------------------------------------------------------------------------------------------------------------------------------------------------------------------------------------------------------------------------------------------------------------------------------------------------------------------------------------------------------------------------------------------------------------------------------------------------------------------------------------------------------------------------------------------------------------------------------------------------------------------------------|
| Setting |                              |                                                                                                                                                                                                                                                                                                                                                                                                                                                                                                                                                                                                                                                                                                                                                                                                                                                                                                                                                                                                                                                                                                                                                                                                                                                        |
| 14.     | Setting of data collection   | <p>Where was the data collected? e.g. <i>home, clinic, workplace</i></p> <p>Children's open questionnaire were done by a Google Forms. It was necessary to have their parent's sign to continue.</p> <p>Adults were interviewed by on-line interviews.</p>                                                                                                                                                                                                                                                                                                                                                                                                                                                                                                                                                                                                                                                                                                                                                                                                                                                                                                                                                                                             |
| 15.     | Presence of non-participants | <p>Was anyone else present besides the participants and researchers?</p> <p>In the case of students, parental presence was recommended.</p>                                                                                                                                                                                                                                                                                                                                                                                                                                                                                                                                                                                                                                                                                                                                                                                                                                                                                                                                                                                                                                                                                                            |
| 16.     | Description of sample        | <p>What are the important characteristics of the sample? e.g. <i>demographic data, date</i></p> <p>Students, teachers, and members of management boards from primary and secondary schools participated in the study, as well as families of students at these same educational levels. There were 30 participants in the student category (average age <math>13.87 \pm 3.29</math> years): 11 (36.67%) females and 19 (63.33%) males, 12 (40%) from state schools and 18 (60%) from private schools, and 10 (33.33%) from primary schools, 10 (33.33%) from secondary schools, and 10 (33.33%) from non-compulsory secondary education. There were 29 participants in the teacher category (<math>36.34 \pm 8.8</math> years): 10 (34.48%) females and 19 (65.52%) males, 15 (51.72%) from state schools and 14 (48.28%) from private schools, and 19 (65.52%) from primary schools and 10 (34.48%) from secondary schools. There were 6 participants in the members of management boards category (<math>44 \pm 5.77</math> years): 3 (50%) females and 3 (50%) males, 3 (50%) from state schools and 3 (50%) from private schools. There were 25 participants in the family category (<math>46.6 \pm 5.28</math> years): 13 (52%) women-mothers</p> |

| No  | Item                   | Guide questions/description                                                                                                                                                                                                |
|-----|------------------------|----------------------------------------------------------------------------------------------------------------------------------------------------------------------------------------------------------------------------|
|     |                        | and 12 (48%) men-fathers, 10 (40%) from state schools and 15 (60%) from private schools, and 11 (44%) from primary schools, 8 (32%) from secondary schools and 6 (24%) from non-compulsory secondary education.            |
|     | Data collection        |                                                                                                                                                                                                                            |
| 17. | Interview guide        | Were questions, prompts, guides provided by the authors? Was it pilot tested?<br>The scripts of data collection tools were made <i>ad hoc</i> by authors in line with previous studies consulted. It was not pilot-tested. |
| 18. | Repeat interviews      | Were repeat interviews carried out? If yes, how many?<br>There were not repeat interviews                                                                                                                                  |
| 19. | Audio/visual recording | Did the research use audio or visual recording to collect the data?<br>All the interviews were video-recorded.                                                                                                             |
| 20. | Field notes            | Were field notes made during and/or after the interview or focus group?<br>There were not field notes during or after the interviews.                                                                                      |
| 21. | Duration               | What was the duration of the interviews or focus group?<br>Students open questionnaire took about 20 minutes each one.<br>Adults interviews had an average duration of 30 minutes.                                         |
| 22. | Data saturation        | Was data saturation discussed?<br>No, it was not.                                                                                                                                                                          |

| No                                         | Item                           | Guide questions/description                                                                                                                                                                                                                                                                                                                                                                                                                  |
|--------------------------------------------|--------------------------------|----------------------------------------------------------------------------------------------------------------------------------------------------------------------------------------------------------------------------------------------------------------------------------------------------------------------------------------------------------------------------------------------------------------------------------------------|
| 23.                                        | Transcripts returned           | <p>Were transcripts returned to participants for comment and/or correction?</p> <p>No, they were not returned.</p>                                                                                                                                                                                                                                                                                                                           |
| <b>Domain 3:<br/>analysis and findings</b> |                                |                                                                                                                                                                                                                                                                                                                                                                                                                                              |
| Data analysis                              |                                |                                                                                                                                                                                                                                                                                                                                                                                                                                              |
| 24.                                        | Number of data coders          | <p>How many data coders coded the data?</p> <p>The second author was the only data coder. The first author checked the coding. There were two different concordance analysis depending on the instrument: open questionnaire for students (k=.91) os adult interview (k=.86).</p>                                                                                                                                                            |
| 25.                                        | Description of the coding tree | <p>Did authors provide a description of the coding tree?</p> <p>Yes, in the Supplementary Material.</p>                                                                                                                                                                                                                                                                                                                                      |
| 26.                                        | Derivation of themes           | <p>Were themes identified in advance or derived from the data?</p> <p>The analysis was both deductive (to study previously raised problems and elements) and inductive (allowed new issues to emerge). The original classification tree was built based on the previously considered concept.</p> <p>The final thematic analysis was promoted by previously established themes that were, mixed with the emerging ones seen in the data.</p> |
| 27.                                        | Software                       | <p>What software, if applicable, was used to manage the data?</p> <p>The Nvivo software (version 12 Plus, <a href="https://www.qsrinternational.com/nvivo/home">https://www.qsrinternational.com/nvivo/home</a>) was used to analyze all the contents from interviews and focus groups.</p>                                                                                                                                                  |
| 28.                                        | Participant checking           | <p>Did participants provide feedback on the findings?</p> <p>No, they did not provide feedback.</p>                                                                                                                                                                                                                                                                                                                                          |

| No        | Item                         | Guide questions/description                                                                                                                                                                                                                                                                                                                                                                                                                                                                                                                                                                                                                                                                                                                                                                                                                                   |
|-----------|------------------------------|---------------------------------------------------------------------------------------------------------------------------------------------------------------------------------------------------------------------------------------------------------------------------------------------------------------------------------------------------------------------------------------------------------------------------------------------------------------------------------------------------------------------------------------------------------------------------------------------------------------------------------------------------------------------------------------------------------------------------------------------------------------------------------------------------------------------------------------------------------------|
| Reporting |                              |                                                                                                                                                                                                                                                                                                                                                                                                                                                                                                                                                                                                                                                                                                                                                                                                                                                               |
| 29.       | Quotations presented         | <p>Were participant quotations presented to illustrate the themes / findings? Was each quotation identified? e.g. <i>participant number</i></p> <p>Yes, a real quote from a participant was used in each thesis on all the themes. An in-depth hermeneutical analysis was performed.</p> <p>Yes, each quotation was identified. The coding used to identify each extract was based on three digits: the first number refers to the specific open questionnaire or interview (numbered from 1 to 25); a descriptor of the analysis group ("Fam" for relatives; "MAE" for Primary School teaches; "PRO" for Secondary and High School teaches; "DIR" for members of the management teams); finally, for students and relatives the last code indicated the educational stage ("PRI" for Primary School; "ESO" for Secondary School; "Bac" for High School).</p> |
| 30.       | Data and findings consistent | <p>Was there consistency between the data presented and the findings?</p> <p>Yes, an attempt was made to gain consistency through triangulations.</p>                                                                                                                                                                                                                                                                                                                                                                                                                                                                                                                                                                                                                                                                                                         |
| 31.       | Clarity of major themes      | <p>Were major themes clearly presented in the findings?</p> <p>Yes, the major themes are clearly identified by section headings.</p>                                                                                                                                                                                                                                                                                                                                                                                                                                                                                                                                                                                                                                                                                                                          |
| 32.       | Clarity of minor themes      | <p>Is there a description of diverse cases or discussion of minor themes?</p> <p>Yes, there is. For example minor themes such as teacher's and student's roles were mentioned.</p>                                                                                                                                                                                                                                                                                                                                                                                                                                                                                                                                                                                                                                                                            |
